# Supplementary material
Source: MDPI journal article supplement (https://www.mdpi.com/2075-163X/12/11/1350)
Supplement: s1 [file s1]

## Supplementary Information

**Table S1:** Bulk geochemistry of total REE extracted accumulated from steps 1-7 of sequential extraction.  
Units of total amount extracted are mg/kg (mg element extracted per kg underclay).

|                                  | Sc | La | Ce | Pr | Nd | Sm | Eu  | Gd | Tb  | Dy | Y  | Ho  | Er | Tm  | Yb | Lu  | REE       |
|----------------------------------|----|----|----|----|----|----|-----|----|-----|----|----|-----|----|-----|----|-----|-----------|
| <b>WV MKT underclay</b>          | 3  | 0  | 2  | 0  | 2  | 1  | 0.5 | 4  | 0.8 | 4  | 18 | 0.6 | 1  | 0.1 | 1  | 0.1 | <b>62</b> |
| <b>WV MKT coarse coal refuse</b> | 2  | 0  | 2  | 0  | 0  | 0  | 0.1 | 0  | 0.1 | 0  | 2  | 0.1 | 0  | 0.0 | 0  | 0.0 | <b>6</b>  |
| <b>central PA LKT underclay</b>  | 1  | 0  | 0  | 0  | 0  | 0  | 0.0 | 0  | 0.0 | 0  | 1  | 0.1 | 0  | 0.0 | 0  | 0.0 | <b>3</b>  |
| <b>central PA MKT underclay</b>  | 2  | 2  | 6  | 1  | 5  | 1  | 0.0 | 3  | 0.4 | 2  | 15 | 0.4 | 1  | 0.1 | 0  | 0.1 | <b>40</b> |

**Table S2:** Bulk geochemistry of total extracted elements accumulated from steps 1-7 of sequential extraction.  
Units of total amount extracted are mg/kg (mg element extracted per kg underclay).

|                                  | Mg  | Al   | Si     | P    | K    | Ca   | Cr | Mn | Fe     | Co | Ni | Cu | Zn  | As | Ba | Th | U   |
|----------------------------------|-----|------|--------|------|------|------|----|----|--------|----|----|----|-----|----|----|----|-----|
| <b>WV MKT underclay</b>          | 745 | 1780 | 12,053 | 1118 | 1277 | 3564 | 4  | 82 | 11,521 | 57 | 91 | 56 | 141 | 35 | 90 | 6  | 1.1 |
| <b>WV MKT coarse coal refuse</b> | 318 | 1560 | 1140   | 19   | 1009 | 1186 | 3  | 13 | 1542   | 7  | 12 | 21 | 34  | 1  | 45 | 1  | 0.5 |

|                                    |     |      |      |        |      |        |   |    |      |    |    |    |    |    |     |   |     |
|------------------------------------|-----|------|------|--------|------|--------|---|----|------|----|----|----|----|----|-----|---|-----|
| central<br>PA MKT<br>undercla<br>y | 187 | 648  | 499  | 14     | 736  | 878    | 1 | 16 | 181  | 4  | 8  | 10 | 46 | 0  | 30  | 1 | 0.5 |
| central<br>PA MKT<br>undercla<br>y | 816 | 1585 | 1854 | 17,156 | 1545 | 19,655 | 4 | 55 | 4363 | 13 | 37 | 39 | 91 | 10 | 168 | 1 | 4.3 |

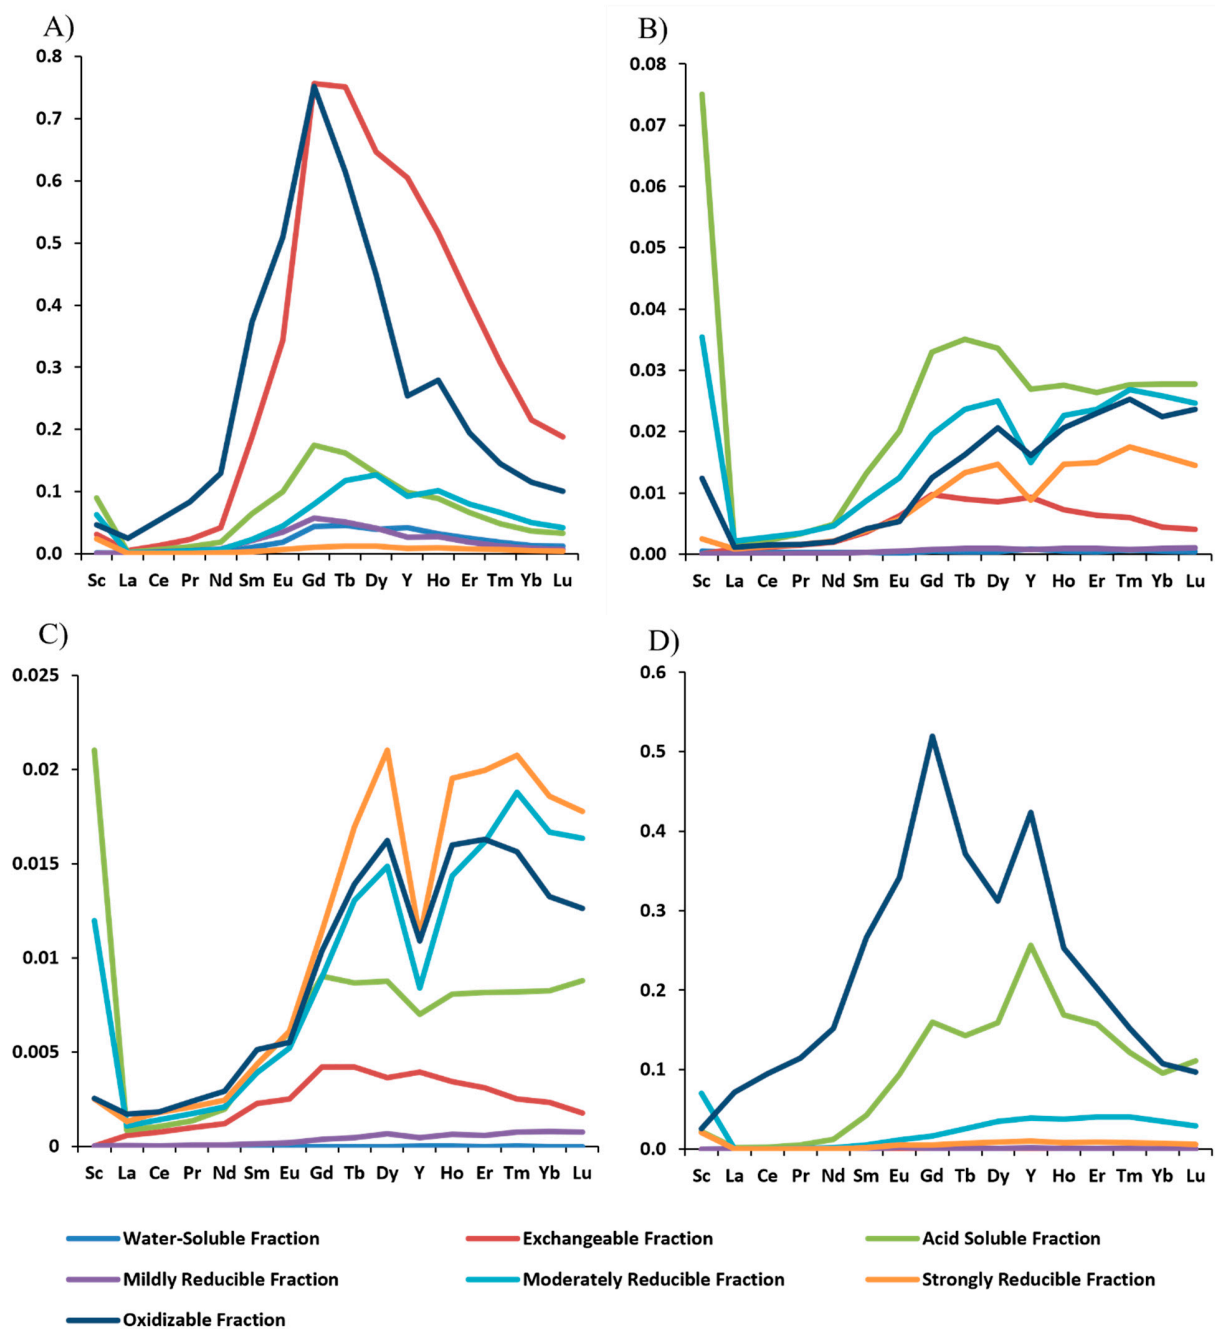

**Figure S1:** Distribution of REE concentrations by elemental weight normalized to upper continental crust concentrations in four coal-related samples. Note that the range of values on the y-axis change from graph to graph. (A) WV MKT underclay. (B) WV MKT coarse coal refuse. (C) Central PA LKT underclay. (D) Central PA MKT underclay.

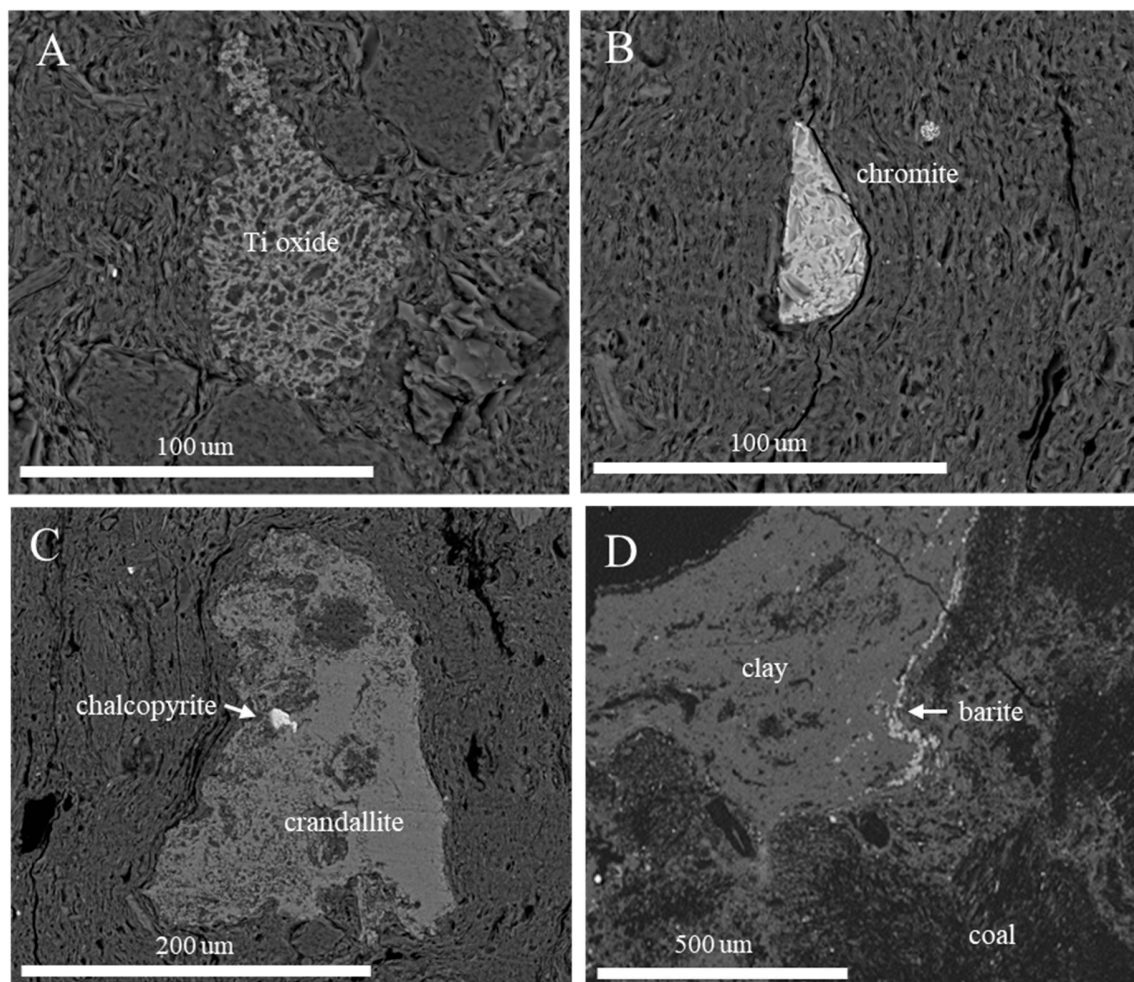

**Figure S2:** WV MKT coarse coal refuse: (A) Ti-oxide, (B) Chromite and (C) Chalcopyrite and crandallite embedded in clay matrix, (D) Barite embedded between coal and clay boundary (central PA MKT underclay).
